# Supplementary material for: Highly reproducible electrochemical biosensor for Influenza A virus towards low-resource settings
Source: Royal Society of Chemistry journal article supplement (doi:10.1039/d3ay01825c), 2024-01-01
Supplement: d3ay01825c1.pdf [file d3ay01825c1.pdf]

## Highly reproducible electrochemical biosensor for Influenza A virus accessible in low-resource settings

Julio Ojeda<sup>1</sup>, Fiorella Torres-Salvador<sup>1</sup>, Nicholas Bruno<sup>1</sup>, Hannah Eastwood<sup>1</sup>, Yulia Gerasimova<sup>1</sup> and Karin Chumbimuni-Torres<sup>1,\*</sup>

<sup>1</sup> Department of Chemistry, University of Central Florida, Orlando, FL 32816, USA

\* Correspondence: karin.chumbimunitorres@ucf.edu

### SUPPORTING INFORMATION

Table S1. Sequences of oligonucleotide used in the study.

| Strand          | Sequence (5'-3') <sup>1</sup>                                                                                                                                                                                                                          |
|-----------------|--------------------------------------------------------------------------------------------------------------------------------------------------------------------------------------------------------------------------------------------------------|
| USL             | /ThiolMC6-D/TTTTTTTTTCGCGTTAACATACAATAGATCGCG                                                                                                                                                                                                          |
| UMeB            | MeBIN/CGGTACATTGTTGAG                                                                                                                                                                                                                                  |
| InfA m-strand   | <b>T CTC GGC TTT</b> /iSp9/ <b>TATGTTAACTTCTCAACAATGTACCG</b> <sup>2</sup>                                                                                                                                                                             |
| InfA f-strand   | <b>GATCTATTG</b> /iSp9/ <b>GAGGGGGCCTGATGG AAC</b>                                                                                                                                                                                                     |
| InfA DNA target | TATGTTCTCTATCGTTCCATCAGGCCCCCTCAAAGCCGAGATCGCGCAGAGACTTGAA                                                                                                                                                                                             |
| InfA_MP_A979    | <u>AATTCTAATACGACTCACTATAGGGAGATTCTAACCGAGGTGCGAAACG</u>                                                                                                                                                                                               |
| InfA_MP_S778-4  | <u>CACTDGGCACGGTGAGCGTGAA</u>                                                                                                                                                                                                                          |
| InfA Amplicon   | GGGAGA UUCUAACC GAGGUCGAAA CGUAUGUUCUCUCUAUC<br><b>GUUCCAUCAGGCCCCCTCAAAGCCGAGA</b> UCGCG CAGAGACUUG<br>AAGAUGUCUUUGCUGGGAAA AACACAGAUC UUGAGGCUCU CAUGGAAUGG CAAAAGACAA<br>GACCAAUUCUGUCACCUCUG ACUAAGGGGA UUUUGGGGUU UGUGUUCACG CUCACCGUGC<br>CCAGUG |

<sup>1</sup> Fragments of strands complementary to another are colored the same and/or underlined. MeB: methylene blue. iSp9: triethylene glycol spacer. Complementary fragments of the strands are color-coded.

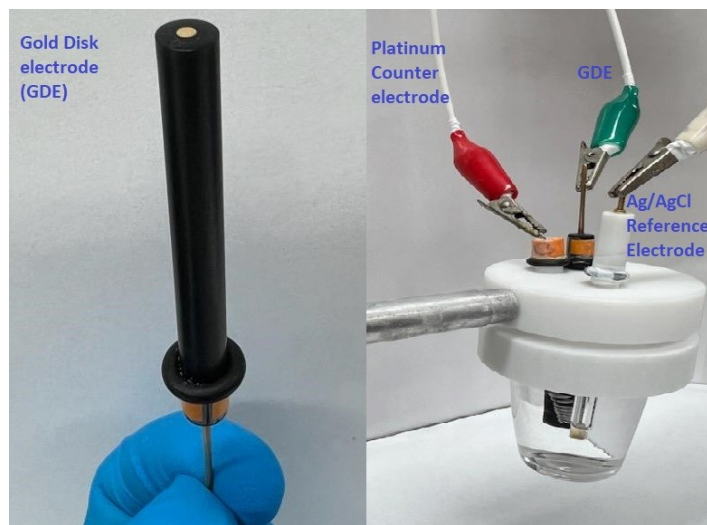

**Figure S1.** Picture of Gold disk electrode (GDE) and Electrochemical Cell.

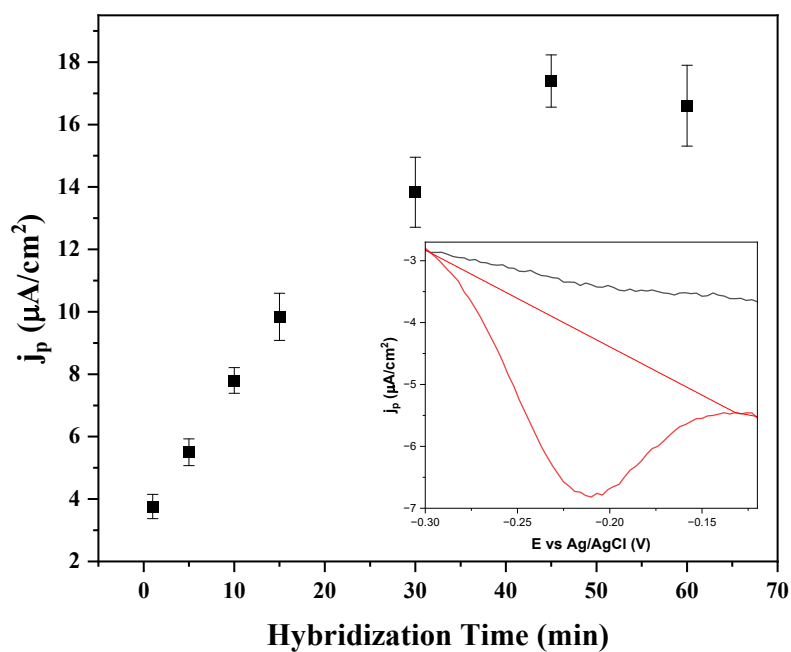

**Figure S2.** Response of the Influenza A Electrochemical biosensor to the presence of 50 nM InfA target for a varied hybridization time (1, 5, 10, 15, 30, 45, and 60 minutes) on Gold disk electrodes. Inset: Square Wave Voltammetry response of the blank (black) and after the addition of the target and incubation for 5 minutes (red), with its respective baseline.

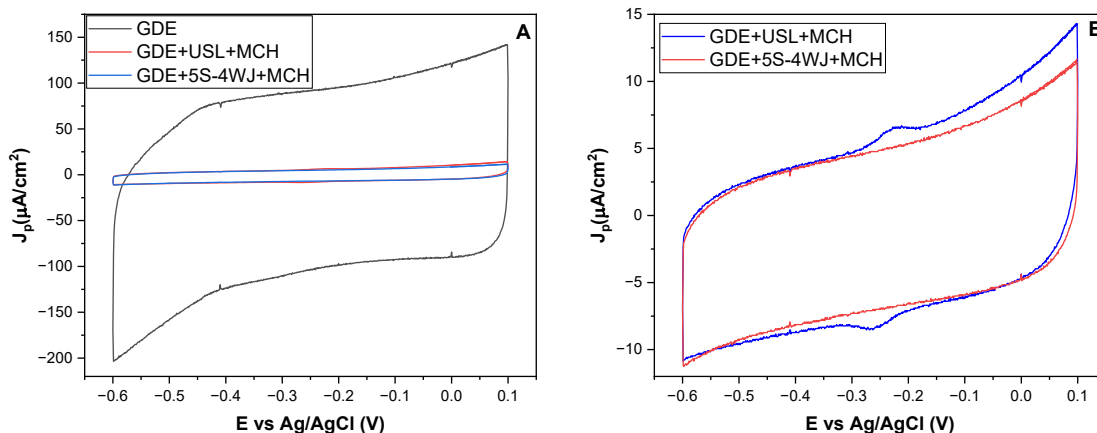

**Figure S3.** Cyclic Voltammetry of A) GDE after and before the addition of USL and MCH, and the formation of the 5S-4WJ structure, B) Same but in different scale. Influenza A target 25nM with 30 min hybridization time at 1V/s.

**Table S2.** Linear regression analysis of Influenza A calibration curve from 2.5 to 25nM

| Significance   | DF | SS    | MS    | Fc     | Ftable |
|----------------|----|-------|-------|--------|--------|
| Regression     | 1  | 56.48 | 56.48 | 697.18 | 4.96   |
| Residual Error | 13 | 1.05  | 0.08  |        |        |
| Lack of Fit    | 3  | 0.39  | 0.13  | 1.96   | 3.71   |
| Pure Error     | 10 | 0.66  | 0.07  |        |        |
| Total          | 14 | 57.54 |       |        |        |

DF: Degrees of freedom, SS: Sum of squares, MS: Mean of squares, Fc: F-statistics

**Table S3.** Linear regression analysis of Influenza A calibration curve from 2.5 to 40nM

| Significance   | DF | SS     | MS     | Fc     | Ftable |
|----------------|----|--------|--------|--------|--------|
| Regression     | 1  | 236.20 | 236.20 | 634.43 | 4.96   |
| Residual Error | 16 | 5.96   | 0.37   |        |        |
| Lack of Fit    | 4  | 4.95   | 1.24   | 14.70  | 3.71   |
| Pure Error     | 12 | 1.01   | 0.08   |        |        |
| Total          | 17 | 242.16 |        |        |        |

DF: Degrees of freedom, SS: Sum of squares, MS: Mean of squares, Fc: F-statistics

**Table S4.** Linear regression analysis of Influenza A calibration curve from 1 to 25 nM

| Significance   | DF | SS    | MS    | Fc      | Ftable |
|----------------|----|-------|-------|---------|--------|
| Regression     | 1  | 90.10 | 90.10 | 1170.09 | 4.96   |
| Residual Error | 16 | 1.23  | 0.08  |         |        |
| Lack of Fit    | 4  | 0.56  | 0.14  | 2.52    | 3.71   |
| Pure Error     | 12 | 0.67  | 0.06  |         |        |

|       |    |       |  |  |  |
|-------|----|-------|--|--|--|
| Total | 17 | 91.33 |  |  |  |
|-------|----|-------|--|--|--|

DF: Degrees of freedom, SS: Sum of squares, MS: Mean of squares, Fc: F-statistics

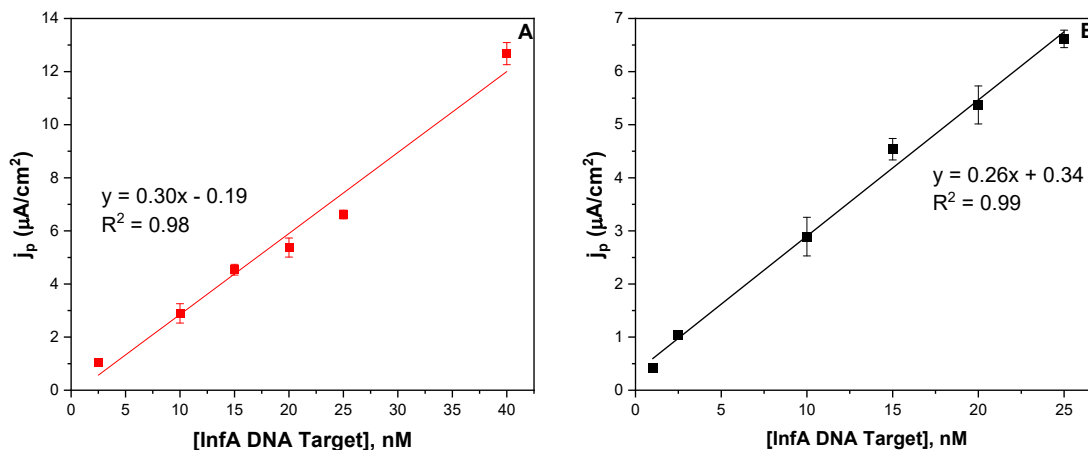

**Figure S4.** Response of the E-Biosensor toward Inf A DNA target at the concentration range of 2.5 to 40 nM (A) and 1 to 25 nM (B) on GDE at a 30-min. hybridization time.

**Table S5.** One-way ANOVA results for recovery test at 2.5, 15, and 25nM InfA DNA target

| Origin of variations | Sum of squares | Degrees of freedom | Average of Squares | F    | Probability | F critic |
|----------------------|----------------|--------------------|--------------------|------|-------------|----------|
| Between groups       | 73.27          | 2                  | 36.63              | 0.21 | 0.81        | 3.35     |
| Within groups        | 4629.11        | 27                 | 171.45             |      |             |          |
| Total                | 4702.37        | 29                 |                    |      |             |          |

**Table S6.** Results for the robustness test from the experiment at  $\pm 10\%$  variation on all factors, evaluated at 25 nM InfA DNA target

| Factor                | Experiment |       |       |       |       |       |       |       |
|-----------------------|------------|-------|-------|-------|-------|-------|-------|-------|
|                       | 1          | 2     | 3     | 4     | 5     | 6     | 7     | 8     |
| pH                    | 8.14       | 8.14  | 8.14  | 8.14  | 6.66  | 6.66  | 6.66  | 6.66  |
| Temperature (°C)      | 27.5       | 27.5  | 22.5  | 22.5  | 27.5  | 27.5  | 22.5  | 22.5  |
| Mg <sup>2+</sup> (mM) | 55         | 45    | 55    | 45    | 55    | 45    | 55    | 45    |
| Result (nM)           | 29.43      | 24.90 | 23.93 | 28.95 | 21.57 | 17.15 | 22.03 | 24.52 |

**Table S7.** Results for the robustness test from experiment at  $\pm 10\%$  variation of Mg<sup>2+</sup> concentration and temperature,  $\pm 5\%$  for pH, evaluated at 25 nM InfA DNA target

| Experiment |  |  |  |  |  |  |  |
|------------|--|--|--|--|--|--|--|
|------------|--|--|--|--|--|--|--|

| Factor           | 1     | 2     | 3     | 4     | 5     | 6     | 7     | 8     |
|------------------|-------|-------|-------|-------|-------|-------|-------|-------|
| pH               | 7.77  | 7.77  | 7.77  | 7.77  | 7.03  | 7.03  | 7.03  | 7.03  |
| Temperature (°C) | 27.5  | 27.5  | 22.5  | 22.5  | 27.5  | 27.5  | 22.5  | 22.5  |
| Mg (mM)          | 55    | 45    | 55    | 45    | 55    | 45    | 55    | 45    |
| Result (nM)      | 19.26 | 26.94 | 22.42 | 25.07 | 25.53 | 19.64 | 21.51 | 22.47 |

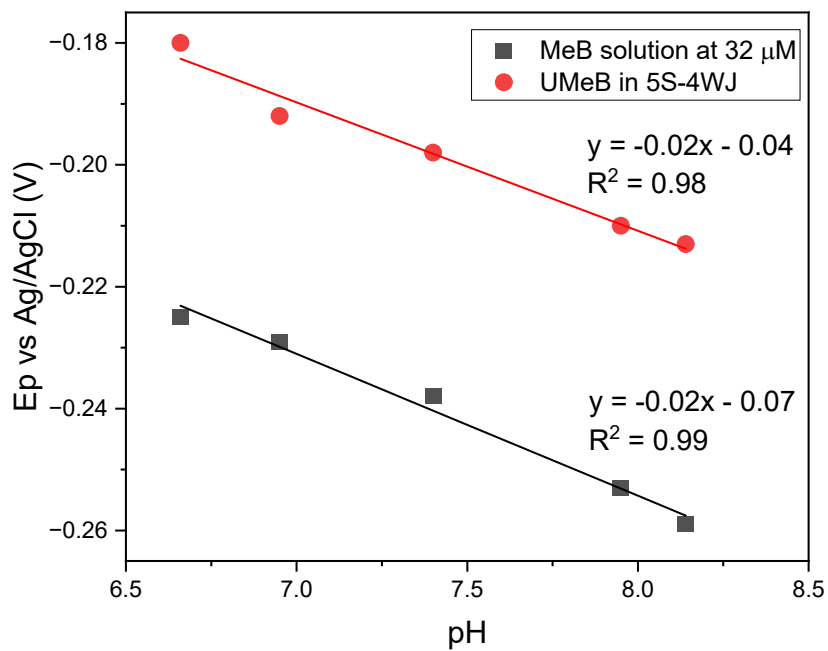

**Figure S5.** Dependence of MeB reduction potential on pH. Red dots, 5S-4WJ structure at 25 nM; black dots, methylene blue solution (32 μM), both in Hybridization buffer at different pH.

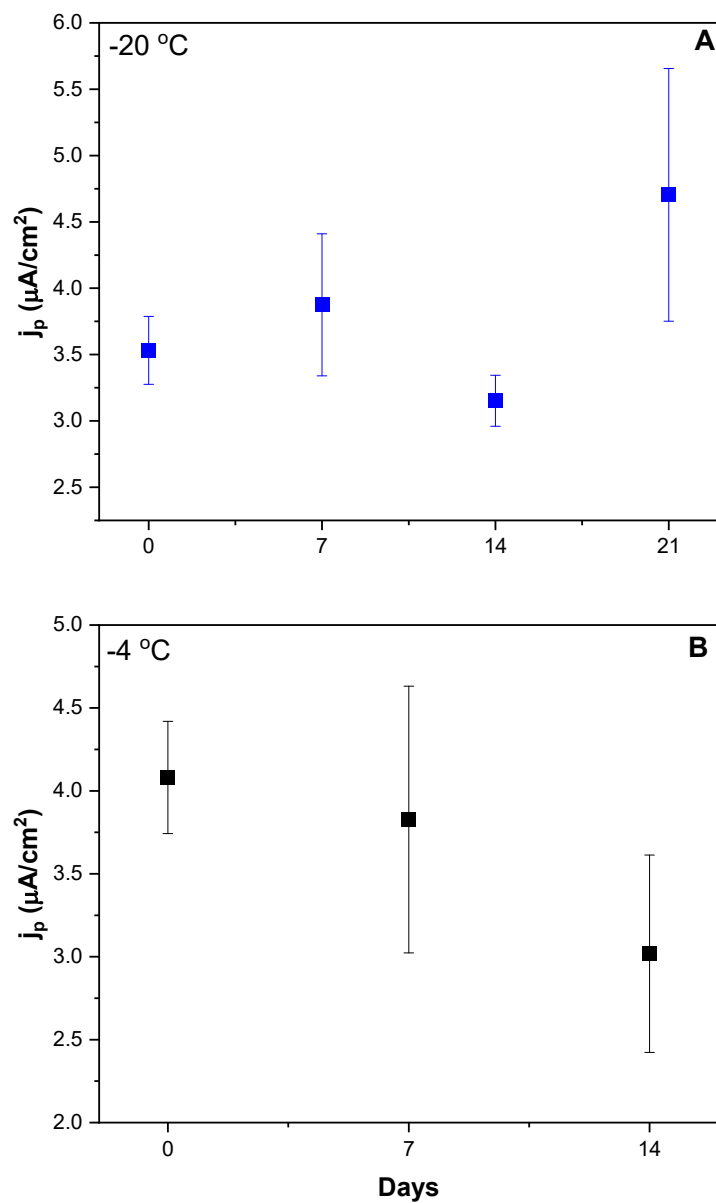

**Figure S6.** Response of the Influenza A electrochemical biosensor to the presence of 25 nM InfA DNA target after 10-min hybridization on USL/MCH-modified GDEs stored for 14-21 days at  $-20\text{ }^\circ\text{C}$  (A) or at  $-4\text{ }^\circ\text{C}$  (B) in the Immobilization buffer.

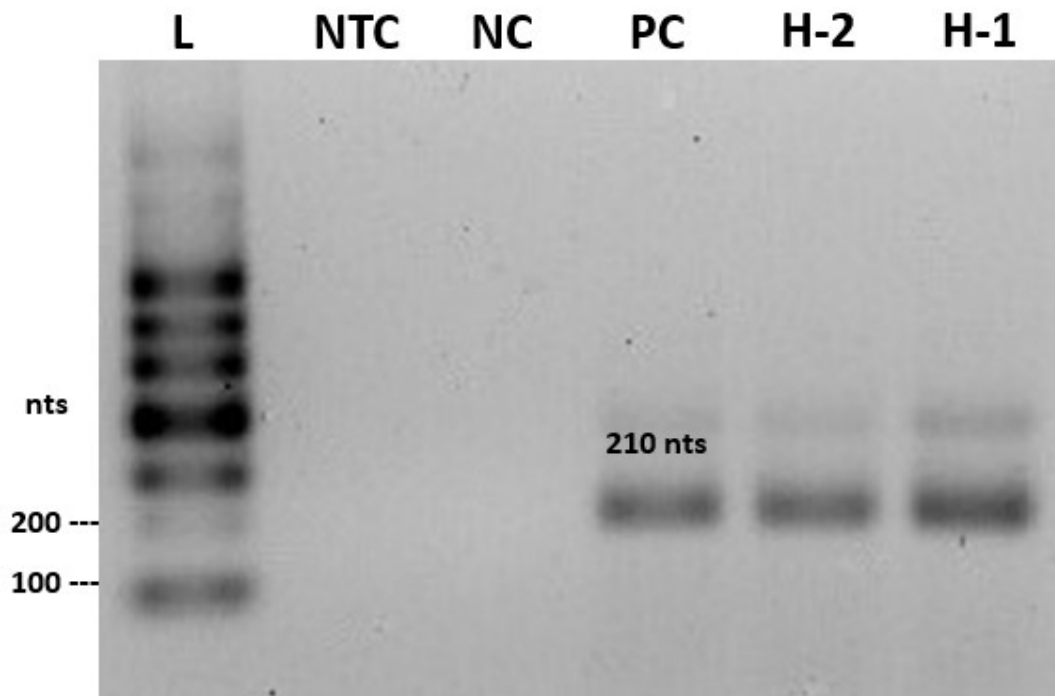

**Figure S7.** Analysis of NASBA amplicons in 2% agarose gel. L: ssRNA ladder (the bands corresponding to 100 and 200 nts RNA fragments are labeled); NTC: NASBA no-template control (no RNA added in the amplification reaction), NC: Negative control (Influenza B RNA used as a template for the amplification reaction), PC: Positive control (Influenza A RNA used as a template for NASBA reaction performed in a Thermocycler), H-2: Influenza A RNA used as a template for NASBA reaction performed in a heater using both the annealing (at 65 °C) and amplification (at 41°C) steps, H-1: Influenza A RNA used as a template for NASBA reaction performed in a heater using 41°C step only.
